# Supplementary material for: Molecular basis for heat desensitization of TRPV1 ion channels
Source: PubMed Central journal article supplement (PMC6513986; doi:10.1038/s41467-019-09965-6), 2019-05-13
Supplement: 41467_2019_9965_MOESM1_ESM.pdf [file 41467_2019_9965_MOESM1_ESM.pdf]

## **Supplementary Information**

### **Molecular Basis for Heat Desensitization of TRPV1 Ion Channels**

Lei Luo et al.

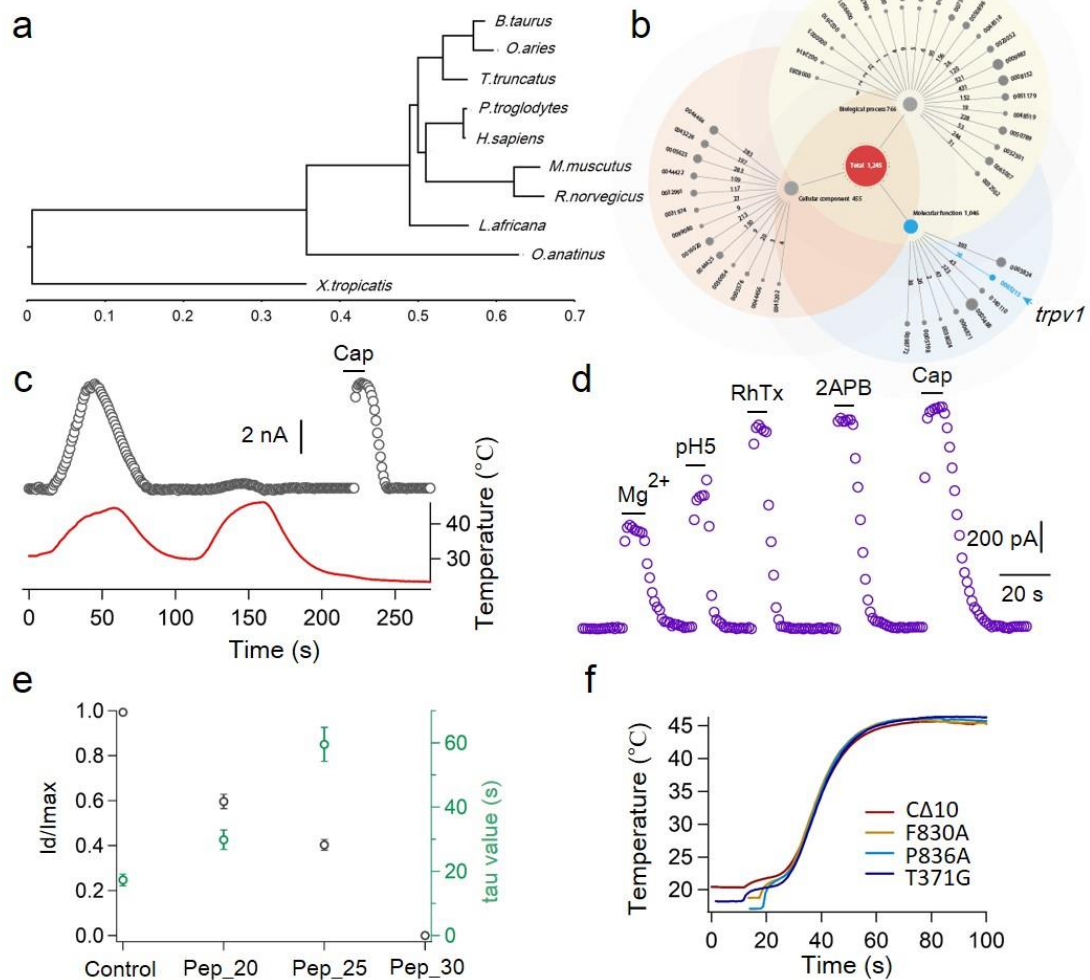

**Supplementary Figure 1.** Positive selection of platypus *trpv1* and functional conformation of platypus TRPV1 channel (pV1). **a** Consensus phylogenetic tree of species used in this study. The divergence time is labeled on the nodes. **b** Functional annotation of genes with positive selection in platypus based on PANTHER. **c** Representative current traces from HEK293T cells expressing mouse TRPV1 (mV1) evoked by repeated application of heat and supersaturated capsaicin. **d** Whole-cell pV1 currents elicited by application of  $Mg^{2+}$  (130 mM), pH 5, RhTx (10  $\mu$ M), 2-APB (3 mM), capsaicin (10  $\mu$ M). **e** Normalized heat desensitization (Dh) degree and tau values of mV1 with C-termini peptides of different lengths. **f** The temperature ramps used in electrophysiological recordings from channel mutants, respectively. All statistical data are given as mean  $\pm$  s.e.m.

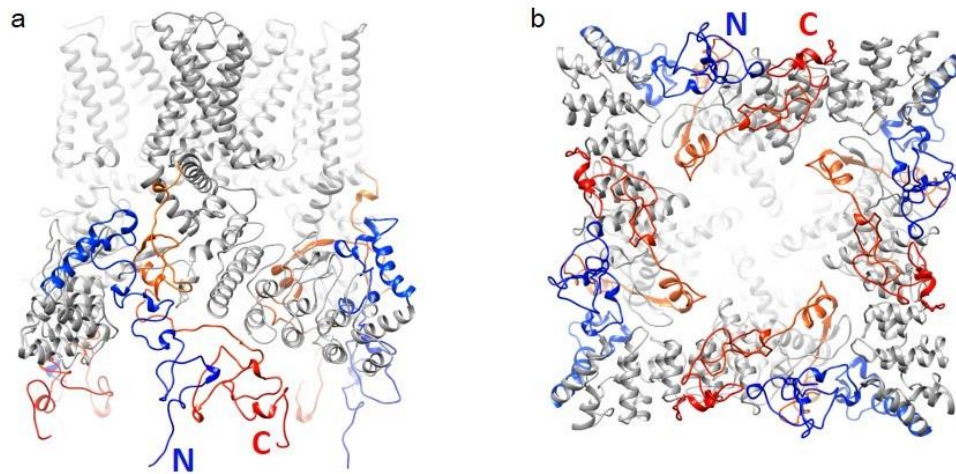

**Supplementary Figure 2.** *de novo* model of the distal N and C termini based on the cryo-EM structures. Ribbon diagram of mV1 atomic model with each of the four identical subunits color-coded, showing views from side (**a**) and bottom (**b**) focused on N and C termini.

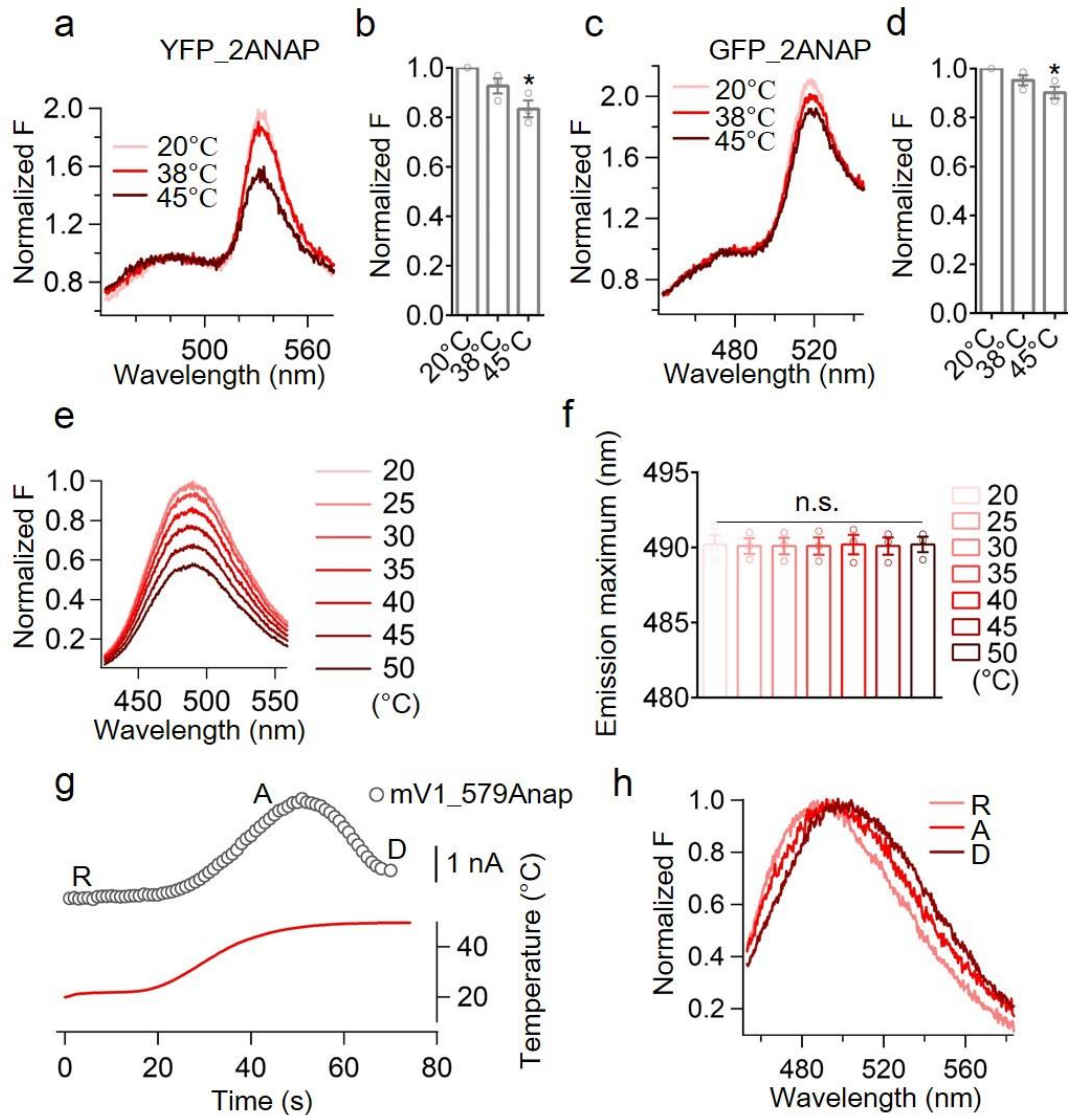

**Supplementary Figure 3.** Heat-evoked current and emission spectra of ANAP-incorporated mouse TRPV1 (mV1\_579ANAP) or YFP/GFP. **a** The spectra of YFP\_2ANAP were acquired at 20, 38 and 45 °C. **b** The spectra in panel **a** were normalized to the ANAP intensity (n=3, two-sided t-test: \*p<0.01). **c** The spectra of GFP\_2ANAP were acquired at 20, 38 and 45 °C. **d** The spectra in panel **c** were normalized to the ANAP intensity (n=3, two-sided t-test: \*p<0.01). **e** The spectra of ANAP were acquired at different temperatures. **f** The emission peak of ANAP at different temperatures (n=3, two-sided t-test: n.s., not significant). **g** Representative current induced by a temperature ramp recorded from HEK 293T cells expressing mV1\_579ANAP. **h** Representative emission spectra at resting (R), activated (A) and desensitized (D) states of ANAP incorporated mV1 (mV1\_579ANAP). Data are mean  $\pm$  s.e.m.

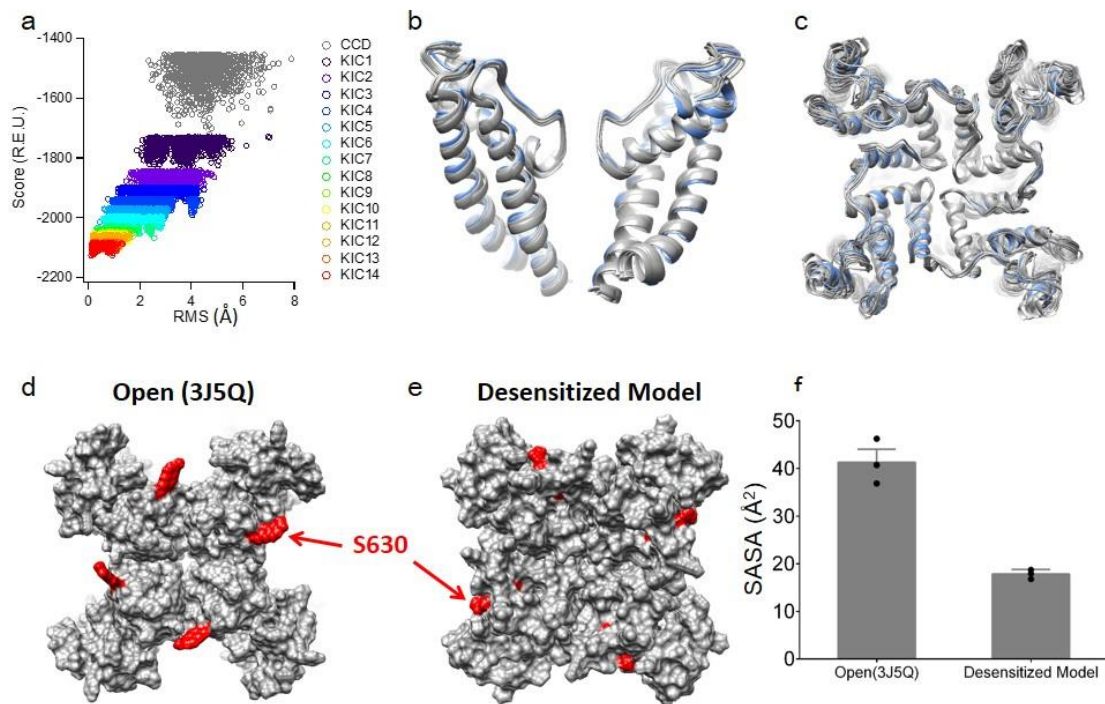

**Supplementary Figure 4.** Modeling of the TRPV1 channel in the desensitized state. **a** The models after fifteen rounds of KIC loop modeling exhibited a funnel-shaped distribution of total energy calculated by Rosetta (R.E.U., Rosetta energy unit). **b** and **c** Top five models after the fifteen round of loop modeling were well converged. The model with the lowest energy (blue) was chosen as the desensitized-state model. **d** and **e** ANAP was incorporated at the 630 sites (red) in the open (**d**) and desensitized (**e**) states, respectively. **f** SASA of ANAP at mV1\_630 site was significantly decreased in the desensitized state (n=3, two-sided t-test: \*\*\*p<0.001). Data are mean ± s.e.m.

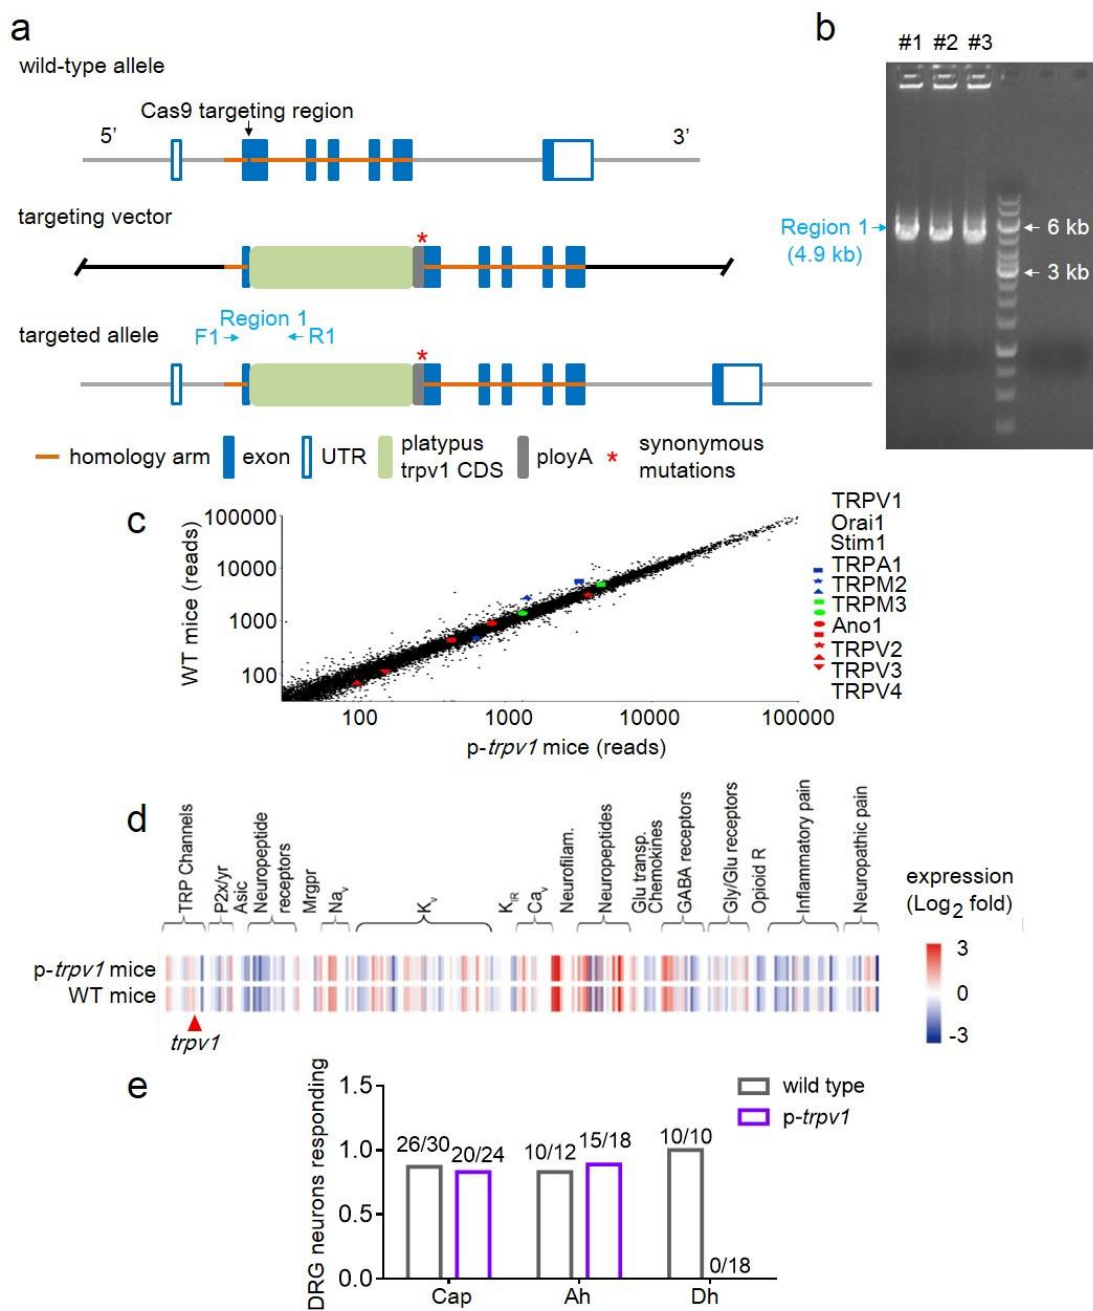

**Supplementary Figure 5.** *p-trpv1* transgenic mice construction and functional confirmation. **a** Schematic depiction of *p-trpv1* mice targeting strategy. Genomic region of mouse *trpv1* locus is diagrammed. Solid bars represent open reading frames (ORFs); open bars represent UTRs. **b** Northern blot analysis of *p-trpv1* mRNA expression in DRG from *p-trpv1*<sup>+/+</sup> mice. The 4.9-kb band identified with the primer pair illustrated in panel a. **c** Transcriptome-wide comparison of mRNA expression between wild-type and *p-trpv1* mice. Several ion channels that have been previously implicated in heat sensing are indicated. **d** Heat map showing the differential expression levels in wild-type and *p-trpv1* mice of a set of about 200 genes implicated in somatosensation. **e** The

percentage of wild-type and *p-trpv1* dorsal root ganglion neurons (DRGs) responding to 10  $\mu$ M capsaicin, and percentages of heat-induced activation and desensitization of wild-type and *p-trpv1* DRG neurons responding to continues heat.



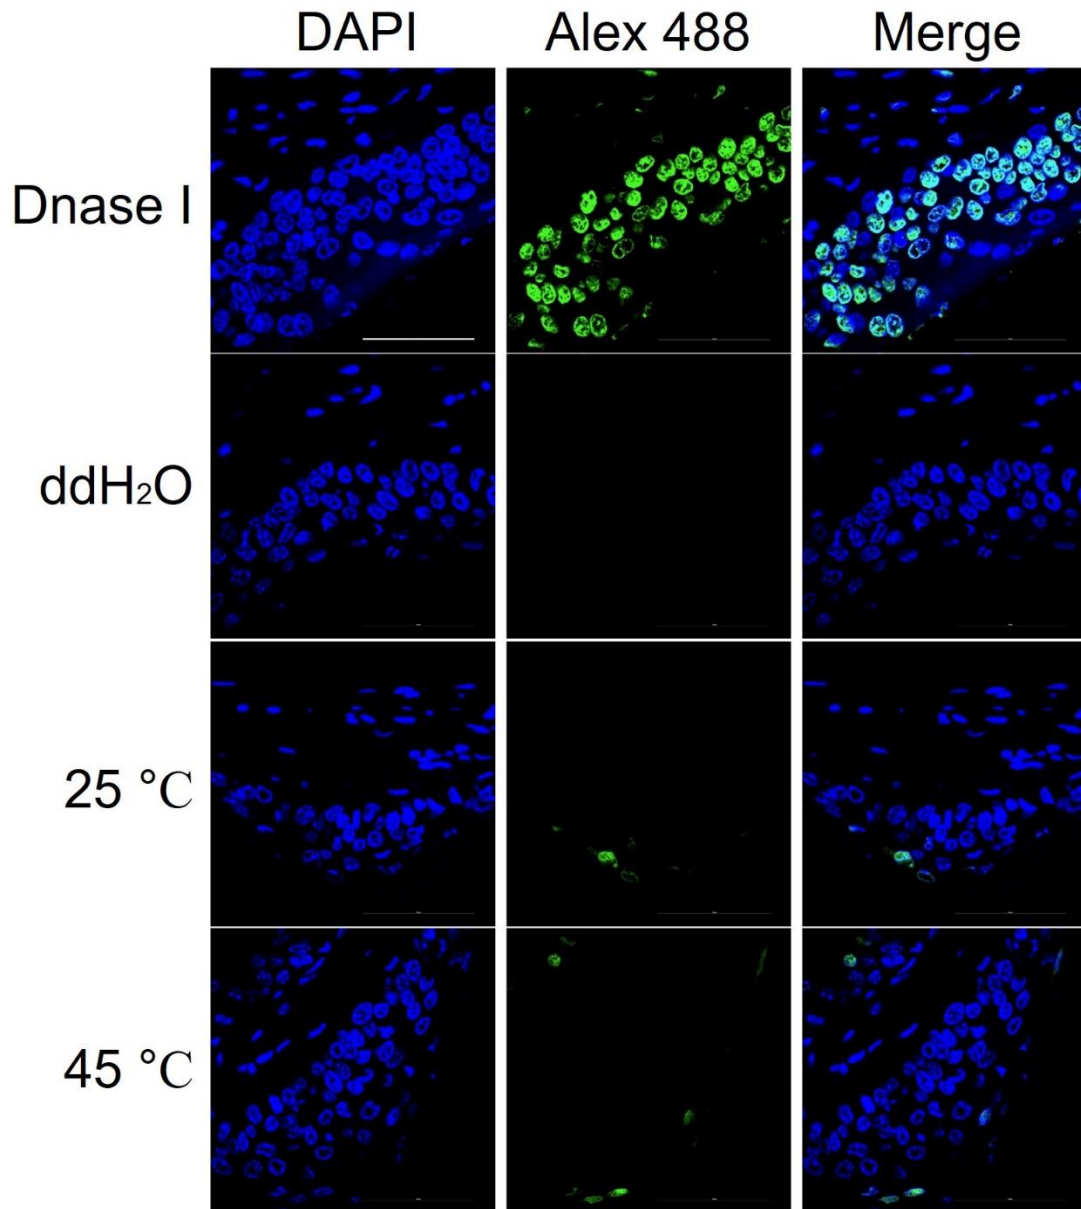

**Supplementary Figure 6.** Detection of apoptosis induced by heat using TUNEL assay. Apoptosis was detected by TUNEL staining (green fluorescence) and the nuclei were stained by DAPI (blue fluorescence) in pV1 over-expressing cells. Scale bar, 50  $\mu$ m.



**Supplementary Table 1. Functional comparison of seven mammalian TRPV1 channels.**

| Species    | EC50_Capsaicin<br>(nM) | Threshold of Ah (°C)   | Dh<br>transition | $\tau$ value_Dh<br>(s) |
|------------|------------------------|------------------------|------------------|------------------------|
| Mouse      | 289 $\pm$ 17 (n = 3)   | 39.8 $\pm$ 0.6 (n = 5) | Yes              | 17.3 $\pm$ 0.5 (n = 3) |
| Platypus   | 307 $\pm$ 23 (n = 5)   | 34.0 $\pm$ 0.5 (n = 8) | No               | n. d.                  |
| Human      | 269 $\pm$ 16 (n = 3)   | 40.1 $\pm$ 0.7 (n = 4) | Yes              | 17.4 $\pm$ 0.5 (n = 3) |
| Fruit bat  | 354 $\pm$ 25 (n = 6)   | 40.2 $\pm$ 0.7 (n = 3) | Yes              | 18.2 $\pm$ 0.4 (n = 3) |
| Tree shrew | 5260 $\pm$ 140 (n = 3) | 36.1 $\pm$ 0.5 (n = 4) | Yes              | 19.1 $\pm$ 0.5 (n = 3) |
| Polar bear | 313 $\pm$ 21 (n = 3)   | 40.6 $\pm$ 0.4 (n = 3) | Yes              | 17.7 $\pm$ 0.6 (n = 3) |
| Camel      | 540 $\pm$ 37 (n = 5)   | 41.3 $\pm$ 0.9 (n = 6) | Yes              | 20.3 $\pm$ 0.4 (n = 4) |

The Latin name of all species was shown in the method. All statistical data are expressed as means  $\pm$  s.e.m. n.d. indicates no data. EC<sub>50</sub>, effector concentration for half-maximum response; Ah, heat-induced activation; Dh, heat-induced desensitization;  $\tau$ \_Dh, tau value of the heat-induced desensitization.

**Supplementary Table 2. Functional comparison of mV1, pV1 and pV1's chimeras.**

| Channel name | EC <sub>50</sub> _Capsaicin<br>(nM) | Threshold of Ah<br>(°C) | Dh<br>transition | τ value_Dh<br>(s)  |
|--------------|-------------------------------------|-------------------------|------------------|--------------------|
| mV1          | 299 ± 10 (n = 3)                    | 39.8 ± 0.5 (n = 6)      | Yes              | 17.3 ± 0.5 (n = 5) |
| pV1          | 301 ± 12 (n = 5)                    | 34.0 ± 0.4 (n = 8)      | No               | n. d.              |
| pV1_mC       | 310 ± 19 (n = 6)                    | 34.2 ± 0.4 (n = 5)      | No               | n. d.              |
| pV1_mN       | 313 ± 16 (n = 6)                    | 33.7 ± 0.4 (n = 5)      | No               | n. d.              |
| pV1_mNC      | 306 ± 13 (n = 6)                    | 34.0 ± 0.5 (n = 9)      | Yes              | 16.9 ± 0.4 (n = 5) |

All statistical data are expressed as means ± s.e.m. n.d. indicates no data. EC<sub>50</sub>, effector concentration for half-maximum response; Ah, heat-induced activation; Dh, heat-induced desensitization; τ\_Dh, tau value of the heat-induced desensitization.

**Supplementary Table 3. Functional comparison of mV1 and its truncation mutants.**

| Channel name                                   | EC <sub>50</sub> _Capsaicin<br>(nM) | Threshold of Ah<br>(°C) | Dh<br>transition | τ value_Dh<br>(s)  |
|------------------------------------------------|-------------------------------------|-------------------------|------------------|--------------------|
| mV1                                            | 299 ± 10 (n = 3)                    | 39.8 ± 0.5 (n = 3)      | Yes              | 17.3 ± 0.5 (n = 3) |
| CΔ30 (Glu <sup>747</sup> -Phe <sup>776</sup> ) | 372 ± 43 (n = 5)                    | 37.6 ± 0.6 (n = 6)      | Yes              | 18.8 ± 0.9 (n = 6) |
| CΔ23 (Ser <sup>777</sup> -Asp <sup>799</sup> ) | 398 ± 51 (n = 3)                    | 37.8 ± 0.6 (n = 6)      | Yes              | 20.0 ± 0.7 (n = 6) |
| CΔ28 (Ala <sup>800</sup> -Ala <sup>827</sup> ) | 343 ± 37 (n = 3)                    | 38.2 ± 0.6 (n = 6)      | Yes              | 20.3 ± 7 (n = 6)   |
| CΔ10 (Phe <sup>830</sup> -Lys <sup>839</sup> ) | 354 ± 39 (n = 6)                    | 39.0 ± 0.5 (n = 9)      | No               | n. d.              |

**Supplementary Table 4. Functional comparison of mV1 and its point mutations.**

| Channel name | EC <sub>50</sub> _Capsaicin<br>(nM) | Threshold of Ah<br>(°C) | Dh transition | τ value_Dh<br>(s)  |
|--------------|-------------------------------------|-------------------------|---------------|--------------------|
| mV1          | 299 ± 10 (n = 3)                    | 39.8 ± 0.5 (n = 3)      | Yes           | 17.3 ± 0.5 (n = 3) |
| S116A        | 186 ± 11 (n = 3)                    | 39.5 ± 0.6 (n = 3)      | Yes           | 18.0 ± 0.6 (n = 4) |
| T371G        | 322 ± 16 (n = 3)                    | 39.9 ± 0.6 (n = 4)      | Yes           | 34.5 ± 1.9 (n = 6) |
| F830A        | 338 ± 27 (n = 3)                    | 40.4 ± 0.5 (n = 3)      | Yes           | 40.0 ± 0.6 (n = 6) |
| K831A        | 354 ± 30 (n = 3)                    | 39.9 ± 0.4 (n = 3)      | Yes           | 17.5 ± 0.6 (n = 3) |
| D832A        | 361 ± 35 (n = 3)                    | 39.4 ± 0.3 (n = 3)      | Yes           | 17.8 ± 0.4 (n = 3) |
| S833A        | 344 ± 26 (n = 3)                    | 39.4 ± 0.5 (n = 3)      | Yes           | 17.1 ± 0.5 (n = 3) |
| M834A        | 329 ± 23 (n = 3)                    | 39.9 ± 0.4 (n = 3)      | Yes           | 16.8 ± 0.6 (n = 3) |
| P836A        | 315 ± 24 (n = 3)                    | 40.1 ± 0.4 (n = 3)      | Yes           | 39.9 ± 0.7 (n = 6) |
| E838A        | 565 ± 54 (n = 3)                    | 39.1 ± 0.4 (n = 3)      | Yes           | 17.4 ± 0.5 (n = 3) |
| K839A        | 293 ± 12 (n = 3)                    | 39.5 ± 0.6 (n = 3)      | Yes           | 17.7 ± 0.4 (n = 3) |

All statistical data are expressed as means ± s.e.m. n.d. indicates no data. EC<sub>50</sub>, effector concentration for half-maximum response; Ah, heat-induced activation; Dh, heat-induced desensitization; τ\_Dh, tau value of the heat-induced desensitization.

**Supplementary Table 5. Functional confirmation of ANAP-incorporated TRPV1 channels.**

| Labeled position | EC <sub>50</sub> _Capsaicin<br>(nM) | low pH | 2APB  | Threshold of Ah<br>(°C) | Dh<br>transition |
|------------------|-------------------------------------|--------|-------|-------------------------|------------------|
| mV1_241          | 290 ± 9 (n = 5)                     | Yes    | Yes   | 37.9 ± 0.4 (n = 3)      | Yes              |
| pV1_241          | 302 ± 11 (n = 6)                    | Yes    | Yes   | 33.9 ± 0.3 (n = 6)      | No               |
| mV1_575          | n. d.                               | n. d.  | n. d. | n. d.                   | n. d.            |
| mV1_579          | 293 ± 8 (n = 3)                     | Yes    | Yes   | 37.8 ± 0.4 (n = 3)      | Yes              |
| mV1_600          | n. d.                               | n. d.  | n. d. | n. d.                   | n. d.            |
| mV1_603          | n. d.                               | n. d.  | n. d. | n. d.                   | n. d.            |
| mV1_605          | n. d.                               | n. d.  | n. d. | n. d.                   | n. d.            |
| mV1_630          | 299 ± 10 (n = 4)                    | Yes    | Yes   | 37.9 ± 0.3 (n = 5)      | Yes              |
| pV1_643          | 306 ± 12 (n = 6)                    | Yes    | Yes   | 33.8 ± 0.3 (n = 7)      | No               |
| mV1_633          | n. d.                               | n. d.  | n. d. | n. d.                   | n. d.            |
| mV1_636          | n. d.                               | n. d.  | n. d. | n. d.                   | n. d.            |
| mV1_640          | n. d.                               | n. d.  | n. d. | n. d.                   | n. d.            |
| mV1_648          | 296 ± 7 (n = 6)                     | No     | Yes   | 38.2 ± 0.3 (n = 4)      | Yes              |
| mV1_650          | n. d.                               | n. d.  | n. d. | n. d.                   | n. d.            |
| mV1_651          | 288 ± 8 (n = 6)                     | Yes    | Yes   | 37.7 ± 0.4 (n = 5)      | Yes              |
| mV1_654          | 304 ± 10 (n = 6)                    | Yes    | Yes   | 38.1 ± 0.3 (n = 6)      | Yes              |
| mV1_656          | n. d.                               | n. d.  | n. d. | n. d.                   | n. d.            |
| mV1_672          | n. d.                               | n. d.  | n. d. | n. d.                   | n. d.            |
| mV1_673          | n. d.                               | n. d.  | n. d. | n. d.                   | n. d.            |
| mV1_676          | n. d.                               | n. d.  | n. d. | n. d.                   | n. d.            |
| mV1_677          | n. d.                               | n. d.  | n. d. | n. d.                   | n. d.            |
| mV1_680          | n. d.                               | n. d.  | n. d. | n. d.                   | n. d.            |
| mV1_684          | n. d.                               | n. d.  | n. d. | n. d.                   | n. d.            |
| mV1_685          | 295 ± 11 (n = 8)                    | Yes    | Yes   | 37.8 ± 0.4 (n = 6)      | Yes              |

All statistical data are expressed as means ± s.e.m. n.d. indicates no data. EC<sub>50</sub>, effector concentration for half-maximum response; Ah, heat-induced activation; Dh, heat-induced desensitization; low pH, pH5; 2APB, 2-aminoethoxydiphenyl borate.

**Supplementary Table 6. Primers used in this study to identify the genotype of transgenic mice.**

| primer | sequence                       |
|--------|--------------------------------|
| F1     | 5'-CAGAGTGCTAGAGATGCTTCAATC-3' |
| R1     | 5'-TGCGTTTAATCCCTTCACTGTTC-3'  |



**Supplementary Table 7. A routine urine test in WT & p-*trpv1* mice.**

| Project          | WT (n=3)      | p- <i>trpv1</i> (n=3) |
|------------------|---------------|-----------------------|
| PH               | 5.5 ± 0.0     | 5.5 ± 0.0             |
| Glu - (mmol/L)   | 0 ± 0.0       | 0 ± 0.0               |
| Vc +3 (mmol/L)   | 5.6 ± 0.13    | 5.6 ± 0.14            |
| SG               | 1.030 ± 0.000 | 1.030 ± 0.007         |
| BLD - (Cell /μL) | 0 ± 0.0       | 0 ± 0.0               |
| PRO +- (g/L)     | 0.15 ± 0.01   | 0.15 ± 0.00           |
| BIL - (μmol/L)   | 0 ± 0.0       | 0 ± 0.0               |
| URO +1 (μmol/L)  | 33 ± 0        | 33 ± 0                |
| KET +1 (mmol/L)  | 1.5 ± 0.05    | 1.5 ± 0.05            |
| WBC- (Cell /μL)  | 0 ± 0.0       | 0 ± 0.0               |

Data are expressed as mean ± s.e.m. from 3 mice.

**Supplementary Table 8. Routine blood test in WT & p-*trpv1* mice.**

| Project                    | WT (n=3)          | p- <i>trpv1</i> (n=3) |
|----------------------------|-------------------|-----------------------|
| WBC ( $\times 10^9/L$ )    | 5.0 $\pm$ 1.92    | 12.3 $\pm$ 1.40       |
| Lymph# ( $\times 10^9/L$ ) | 2.7 $\pm$ 1.12    | 8.1 $\pm$ 2.09        |
| Mon# ( $\times 10^9/L$ )   | 0.2 $\pm$ 0.05    | 0.5 $\pm$ 0.12        |
| Gran# ( $\times 10^9/L$ )  | 2.1 $\pm$ 0.28    | 3.7 $\pm$ 0.62        |
| Lymph (%)                  | 54.5 $\pm$ 2.49   | 66.2 $\pm$ 7.27       |
| Mon (%)                    | 3.1 $\pm$ 0.22    | 3.7 $\pm$ 0.49        |
| Gran (%)                   | 42.4 $\pm$ 6.06   | 30.1 $\pm$ 3.35       |
| RBC ( $\times 10^{12}/L$ ) | 9.81 $\pm$ 1.02   | 11.13 $\pm$ 0.80      |
| HGB (g/L)                  | 148 $\pm$ 10.66   | 165 $\pm$ 13.91       |
| HCT (%)                    | 46.5 $\pm$ 4.02   | 54.7 $\pm$ 7.30       |
| MCV (fL)                   | 47.5 $\pm$ 1.27   | 49.2 $\pm$ 2.19       |
| MCH (pg)                   | 15.0 $\pm$ 0.74   | 14.8 $\pm$ 0.37       |
| MCHC (g/L)                 | 318 $\pm$ 7.76    | 301 $\pm$ 11.34       |
| RDW (%)                    | 14.5 $\pm$ 0.38   | 14.2 $\pm$ 0.45       |
| PLT ( $\times 10^9/L$ )    | 464 $\pm$ 18.57   | 435 $\pm$ 17.93       |
| MPV (fL)                   | 5.3 $\pm$ 0.34    | 5.7 $\pm$ 0.60        |
| PDW                        | 15.9 $\pm$ 0.75   | 16.7 $\pm$ 0.54       |
| PCT (%)                    | 0.245 $\pm$ 0.004 | 0.247 $\pm$ 0.004     |

Data are expressed as mean  $\pm$  s.e.m. from 3 mice.

**Supplementary Table 9. Blood bio-chemistry examination in WT & p-*trpv1* mice.**

| Project         | WT (n=3)     | p- <i>trpv1</i> (n=3) |
|-----------------|--------------|-----------------------|
| TP (g/L)        | 48.3 ± 3.7   | 55.8 ± 4.4            |
| ALB (g/L)       | 33.7 ± 1.9   | 37.5 ± 2.8            |
| GLB (g/L)       | 14.6 ± 2.1   | 18.3 ± 1.9            |
| ALB/GLB         | 2.31 ± 0.20  | 2.05 ± 0.04           |
| ALT (IU/L)      | 61.10 ± 4.80 | 80.00 ± 8.50          |
| AST (IU/L)      | 254.8 ± 17.1 | 337.5 ± 33.2          |
| AST/ALT         | 4.20 ± 0.08  | 4.20 ± 0.05           |
| TB (µmol/L)     | 0.8 ± 0.1    | 1.3 ± 0.2             |
| DB (µmol/L)     | 0.70 ± 0.05  | 0.8 ± 0.08            |
| IDBIL (µmol/L)  | 0.2 ± 0.0    | 0.5 ± 0.1             |
| TBA (µmol/L)    | 7.6 ± 0.4    | 6.7 ± 0.8             |
| ALP (IU/L)      | 261.0 ± 30.8 | 231.5 ± 22.1          |
| Urea (mmol/L)   | 9.21 ± 0.76  | 11.38 ± 0.99          |
| Cre (µmol/L)    | 10.20 ± 0.80 | 13.40 ± 0.67          |
| UA (µmol/L)     | 64.7 ± 9.9   | 105.3 ± 15.2          |
| GLU (mmol/L)    | 7.9 ± 0.4    | 7.6 ± 0.4             |
| TC (mmol/L)     | 1.88 ± 0.19  | 2.57 ± 0.40           |
| F-CHOL (mmol/L) | 0.38 ± 0.07  | 0.55 ± 0.07           |
| TG (mmol/L)     | 1.05 ± 0.06  | 1.17 ± 0.13           |
| HDL-C (mmol/L)  | 1.42 ± 0.20  | 1.87 ± 0.28           |
| LDL-C (mmol/L)  | 0.41 ± 0.03  | 0.55 ± 0.05           |
| apoA1 (g/L)     | 0.03 ± 0.00  | 0.03 ± 0.00           |
| apoB (g/L)      | 0.12 ± 0.03  | 0.20 ± 0.04           |
| Ca (mmol/L)     | 2.29 ± 0.15  | 2.56 ± 0.13           |

Data are expressed as mean ± s.e.m. from 3 mice.

**Supplementary Table 10. Primers used in this study to generate TRPV1 chimeras.**

| Name        | Primer-Forward                              | Primer-Reverse                              |
|-------------|---------------------------------------------|---------------------------------------------|
| pV1_mNC_mV1 | ctgatgggggagacagtga<br>caagattgcacaagagagc  | gaagttgaagtaaaatgc<br>gcttgacaaatctgtcccac  |
| pV1_mNC_pV1 | gacagattgtcaagcgc<br>atattttacttcaacttcttc  | ctcttgcaatctgttca<br>ctgtctccccatcagggc     |
| pV1_mC_mV1  | ctgatgggggagacagtga<br>acaagattgcacaagagagc | ccgggcccggtaccggt<br>ttctcccctggggccatgga   |
| pV1_mC_pV1  | atggccccaggggagaaaa<br>cggtagccggggccgggat  | ctcttgcaatctgttca<br>ctgtctccccatcagggc     |
| pV1_mN_mV1  | gatctcgagctcaagcttat<br>ggagaaatgggctagctta | gaagttgaagtaaaatgc<br>gcttgacaaatctgtccca   |
| pV1_mN_pV1  | gacagattgtcaagcgc<br>atattttacttcaacttcttc  | gctagcccatttctcataa<br>gcttgagctcgagatctga  |
| mC_mV1      | gctagcgtttaaacttaaaa<br>caagattgcacaagagagc | ctggatatctgcagaatfff<br>tctcccctggggccatgga |
| pC_pV1      | gctagcgtttaaacttaaaa<br>caaggctcgaagaaagc   | ctggatatctgcagaatfff<br>cttctaaaataagtgactc |

**Supplementary Table 11. Primers used in this study to generate mV1 truncation mutants.**

| Name                                           | Primer-Forward                            | Primer-Reverse                           |
|------------------------------------------------|-------------------------------------------|------------------------------------------|
| CΔ30 (Glu <sup>747</sup> -Phe <sup>776</sup> ) | agggtggattccctgagg<br>tcaggccgagttcaggg   | ccgcagggaatccaccct<br>gaagcaccaccggaagtc |
| CΔ23 (Ser <sup>777</sup> -Asp <sup>799</sup> ) | ctgagcttcgcaagcact<br>cgagatagggcatagcacc | agtgcttgcgaagctcag<br>ggtgcgcttgacgcctc  |
| CΔ28 (Ala <sup>800</sup> -Ala <sup>827</sup> ) | ctgagggacgaggtcttc<br>aaggattccatggcccca  | gaagacctcgtccctcag<br>aaggggaaccagggcaaa |
| CΔ10 (Phe <sup>830</sup> -Lys <sup>839</sup> ) | gctgaggtctcaggggaag<br>ccgaattctgcagtcgac | cttcctgagacctcagc<br>atcctctggcttaagggga |

**Supplementary Table 12. Primers used in this study to generate mV1 point mutations.**

| Name  | Primer-Forward                         | Primer-Reverse                       |
|-------|----------------------------------------|--------------------------------------|
| S116A | gatcgcaggccaatcttcgacgctgtggctcagagc   | gtcgaagattgcctgcgatcatagagccttggggg  |
| T371G | aggaagttcgagaatgggcctatgggccctgtgcac   | ggcccattctcggaacttctggacaggtgccggca  |
| F830A | gctgaggtcgcaaaggattccatggccccaggggag   | ggaatcctttcgacctcagcatcctctggcttaag  |
| K831A | gaggtcttcgacattccatggccccaggggagaaa    | catggaatctgcgaagacctcagcatcctctggctt |
| D832A | gtcttcaaggcatccatggccccaggggagaaatca   | ggccatggatgccttgaagacctcagcatcctctgg |
| S833A | ttcaaggatgcaatggccccaggggagaaatcagg    | tggggccattgcatccttgaagacctcagcatcctc |
| M834A | aaggattccgcagccccaggggagaaatcaggaag    | ccctggggctgcggaatccttgaagacctcagcatc |
| P836A | tccatggccgcaggggagaaatcaggggaagccgaat  | tttctcccctggggccatggaatccttgaagacctc |
| E838A | gccccaggggcaaaatcaggggaagccgaattctgca  | ccctgattttgccctggggccatggaatccttga   |
| K839A | ccaggggagggcatcaggggaagccgaattctgcagtc | cttcctgatgcctcccctggggccatggaatcctt  |



**Supplementary Table 13. Primers used in this study to generate ANAP-incorporated TRPV1 channels.**

| Name    | Primer-Forward                        | Primer-Reverse                        |
|---------|---------------------------------------|---------------------------------------|
| mV1_241 | aagaaaacctagggaggcctggcttctactttggt   | aggcctcccctaggttttctgaagaagtccccgtt   |
| pV1_241 | aagaaaacctagggccggccggcgtttttatttgggt | cggccggccctaggttttctaaagaagtcacccatg  |
| mV1_575 | aagatgatctagagagacctgtgtcggtttatgttc  | caggtctctctagatcatcttctcaatcatgacagc  |
| mV1_579 | agagacctgtagcggtttatgttcgtctacctcgtg  | cataaaccgctacaggtctctgaggatcatcttctc  |
| mV1_600 | gtgacactgtaggaggatgggaagaataactcactg  | cccacctcctacagtgtcactacggctgtggaaaa   |
| mV1_603 | atcgaggattagaagaataactcactgcctgtggag  | gttattcttctaactcctcgatcagtgtcactacggc |
| mV1_605 | gatgggaagtagaactcactgcctgtggagtccca   | cagtgagttctactcccacctcgcgatcagtgtcac  |
| mV1_630 | tcttacaactagctgtattccacatgtctggagctg  | ggaatacagctagttgtaaggttacctggcctgca   |
| pV1_643 | tcctataactagctgtactctacttgcctggagctc  | agagtacagctagttataggaagggaagaaggctt   |
| mV1_633 | agcctgtattagacatgtctggagctgtcaagttc   | cagacatgtctaatacaggtgttgaaggttacc     |
| mV1_636 | tccacatgttaggagctgttaagttaccatcggc    | gaacagctcctaacatgtggaatacaggtgttga    |
| mV1_640 | gagctgttctagttccaccatcgcatgggtgacctg  | gatggtgaactagaacagctccagacatgtggaata  |
| mV1_648 | atgggtgactaggagttaccgagaactatgacttc   | ggtgaactcctagtcacccatgccgatggtgaactt  |
| mV1_650 | gacctggagtagaccgagaactatgacttcaaggct  | gttctcgggtctactccaggtcacccatgccgatggt |
| mV1_651 | ctggagttctagagaaactatgacttcaaggctgtc  | atagttctctagaactccaggtcacccatgccgat   |
| mV1_654 | accgagaactaggacttcaaggctgtcttcatcatc  | cttgaagtctagttctcgggtgaactccaggtcacc  |
| mV1_656 | aactatgactagaaggctgtcttcatcatcctgfta  | gacagccttctagtcatagttctcgggtgaactccag |
| mV1_672 | attctcacctagatcctcctgctcaacatgctcatt  | caggaggatctaggtgagaatcacataggccagtaa  |
| mV1_673 | ctcacctactagctcctgctcaacatgctcattgct  | gagcaggagctagtaggtgagaatcacataggccag  |
| mV1_676 | atcctcctgtagaacatgctcattgctctcatgggc  | gagcatgttctacaggaggatgtaggtgagaatcac  |
| mV1_677 | ctcctgctctagatgctcattgctctcatggcgag   | aatgagcatctagagcaggaggatgtaggtgagaat  |
| mV1_680 | aacatgctctaggctctcatggcgagactgtcaac   | catgagagcctagagcatgttgagcaggaggatgta  |
| mV1_684 | gctctcatgtaggagactgtcaacaagattgcacaa  | gacagtctcctacatgagagcaatgagcatgttgag  |
| mV1_685 | ctcatgggctagactgtcaacaagattgcacaagag  | gttgacagtctagccatgagagcaatgagcatgtt   |

## Supplementary Methods

### Commands in Rosetta to perform loop modeling:

```
/home/fanyang/rosetta/main/source/bin/loopmodel.linuxgccrelease \  
-in:path:database /home/fanyang/rosetta2015.25/main/database \  
-score:weights membrane_highres_Menv_smooth.wts \  
-in:file:fullatom \  
-membrane:normal_cycles 100 \  
-membrane:normal_mag 15 \  
-membrane:center_search \  
-ignore_unrecognized_res \  
-symmetry:symmetry_definition \  
/home/fanyang/projects/input_files/3J5Q_2018/4D_ABCD_r_4D_after_ccd_relaxed_r.s  
ymm \  
-symmetry:initialize_rigid_body_dofs \  
-in:file:spanfile /home/fanyang/projects/input_files/3J5Q_2018/3J5Q_FL.span \  
-in:file:s /share/work/fanyang/work/3J5Q_FL_KIC5-3J5Q_2018-  
_/top20_score_filtered/_1D/${SLURM_ARRAY_TASK_ID}.pdb \  
-loops:loop_file /home/fanyang/projects/input_files/3J5Q_2018/3J5Q_FL_SF.loop \  
-loops:remodel perturb_kic \  
-loops:refine refine_kic \  
-loops:relax no \  
-loops:strict_loops \  
-loops:build_attempts 20 \  
-relax:bb_move false \  
-max_inner_cycles 30 \  
-nstruct 51 \  
-out:prefix msymm-loop-kic- \  
-out:file:silent /share/work/fanyang/work/3J5Q_FL_KIC6-3J5Q_2018-  
_/${SLURM_ARRAY_TASK_ID}/msymm-relax-3J5Q_2018_${SLURM_ARRAY_TASK_ID}.silent \  
-out:file:silent_struct_type binary \  
-mute all
```

## Rosetta scripts to perform SASA calculation and filtering:

```
<ROSETTASCRIPTS>
  <RESIDUE_SELECTORS>
    <Not name="630_unselected">
      <Index resnums=272/>
    </Not>
  </RESIDUE_SELECTORS>
  <TASKOPERATIONS>
    <OperateOnResidueSubset name="630_only" selector="6300_unselected" >
      <PreventRepackingRLT/>
    </OperateOnResidueSubset>
  </TASKOPERATIONS>
  <SCOREFXNS>
  </SCOREFXNS>
  <FILTERS>
    <TotalSasa      name=630_sasa      threshold=10      task_operations=630_only
report_per_residue_sasa=1/>
  </FILTERS>
  <MOVERS>
  </MOVERS>
  <PROTOCOLS>
    <Add filter=630_sasa/>
  </PROTOCOLS>

</ROSETTASCRIPTS>
```

## Commands in Rosetta to incorporate ANAP into TRPV1 models

```
-database /home/fan/rosetta/main/database  
-in:file:fullatom  
-ignore_unrecognized_res  
-s /home/fan/Rosetta/Project_ANAP_Parameterization/3J5Q.pdb  
-backrub:ntrials 10  
-nstruct 1  
-mc_kt 0.6  
-resfile /home/fan/Rosetta/Project_ANAP_Parameterization/630ANP_3J5Q.resfile  
-overwrite
```

630ANP\_3J5Q.resfile:

```
NATRO  
start  
630 A EMPTY NC ANP  
630 B EMPTY NC ANP  
630 C EMPTY NC ANP  
630 D EMPTY NC ANP
```
